# Supplementary material for: ATAD2 Upregulation Promotes Tumor Growth and Angiogenesis in Endometrial Cancer and Is Associated with Its Immune Infiltration
Source: Hindawi journal article supplement (doi:10.1155/2022/2334338), 2022-11-28
Supplement: f1 [file 2334338.f1.pdf]

| <b>Abbreviation</b> | <b>Full Name</b>                      |
|---------------------|---------------------------------------|
| ACC                 | Adrenocortical Carcinoma              |
| BLCA                | Bladder Urothelial Carcinoma          |
| BRCA                | Breast Invasive Carcinoma             |
| CESC                | Cervical and Endocervical Cancer      |
| CHOL                | Cholangiocarcinoma                    |
| COAD                | Colon Adenocarcinoma                  |
| DLBC                | Diffuse Large B-cell Lymphoma         |
| ESCA                | Esophageal Carcinoma                  |
| GBM                 | Glioblastoma Multiforme               |
| HNSC                | Head and Neck Cancer                  |
| KICH                | Kidney Chromophobe                    |
| KIRC                | Kidney Renal Clear Cell Carcinoma     |
| KIRP                | Kidney Renal Papillary Cell Carcinoma |
| LAML                | Acute Myeloid Leukemia                |
| LGG                 | Lower Grade Glioma                    |
| LIHC                | Liver Hepatocellular Carcinoma        |
| LUAD                | Lung Adenocarcinoma                   |
| LUSC                | Lung Squamous Cell Carcinoma          |
| MESO                | Mesothelioma                          |
| OV                  | Ovarian Serous Cystadenocarcinoma     |
| PAAD                | Pancreatic Adenocarcinoma             |
| PCPG                | Pheochromocytoma and Paraganglioma    |
| PRAD                | Prostate Adenocarcinoma               |
| READ                | Rectum Adenocarcinoma                 |
| SARC                | Sarcoma                               |
| SKCM                | Skin Cutaneous Melanoma               |
| STAD                | Stomach Adenocarcinoma                |
| TGCT                | Testicular Germ Cell Tumors           |
| THCA                | Thyroid Carcinoma                     |
| THYM                | Thymoma                               |
| UCEC                | Uterine Corpus Endometrial Carcinoma  |
| UCS                 | Uterine Carsinosarcoma                |
| UVM                 | Uveal melanomas                       |

Note: This table is a list of full names and abbreviations of tumor extensions
